# Supplementary material
Source: publisher site journal article supplement (http://www.oncotarget.com/Top_25_countries.docx)
Supplement: Supplementary file 1 [file Top_25_countries.docx]

Publication Years 2010-2012

(mostly before IF)

Countries %

**USA** **61.717**

**ENGLAND** 9.281

**ITALY** 9.049

**GERMANY** 8.585

**CANADA** 6.265

FRANCE 5.800

**JAPAN** 4.176

CHINA 3.016

AUSTRIA 3.016

AUSTRALIA 3.016

SPAIN 2.552

NETHERLANDS 2.088

SWEDEN 1.624

SWITZERLAND 1.392

SCOTLAND 1.392

WALES 0.928

SINGAPORE 0.928

SERBIA 0.928

ISRAEL 0.928

BELGIUM 0.928

RUSSIA 0.696

IRELAND 0.696

HUNGARY 0.696

GREECE 0.696

DENMARK 0.696

First impact factor, IF2011, was announced in Summer 2012. Papers, submitted before this time, were published in 2010-2012 (431 items for 3 years). USA, Canada and England, Wales, Scotland accounted for 80%.

Source: Web of Science databases

Publication Years 2013-2016

(mostly after IF)

Countries %

**CHINA** **39.473**

**USA** **33.992**

**ITALY** 8.274

**GERMANY** 7.065

**S KOREA** 5.385

**ENGLAND** 4.881

TAIWAN 4.515

FRANCE 4.289

**JAPAN** 3.845

CANADA 3.741

SPAIN 3.176

AUSTRALIA 2.506

NETHERLANDS 2.027

SWEDEN 1.914

SWITZERLAND 1.618

BELGIUM 1.453

ISRAEL 1.218

SINGAPORE 1.140

AUSTRIA 1.044

BRAZIL 0.922

NORWAY 0.870

POLAND 0.792

RUSSIA 0.740

DENMARK 0.731

SCOTLAND 0.653

After IF announcement, a number of submissions increased dramatically and exponentially, resulting in substantial increase of published items (11494 items for 4 years). Publications from China, Taiwan and South Korea increased disproportionally, indicating dependence on IF.
